# Supplementary material for: Impact of operation duration on short-term and long-term prognosis in patients undergoing radical colorectal surgery
Source: PubMed Central journal article supplement (PMC8899385; doi:10.7150/jca.65817), 2022-01-16
Supplement: jcav13p1160s1.pdf [file jcav13p1160s1.pdf]

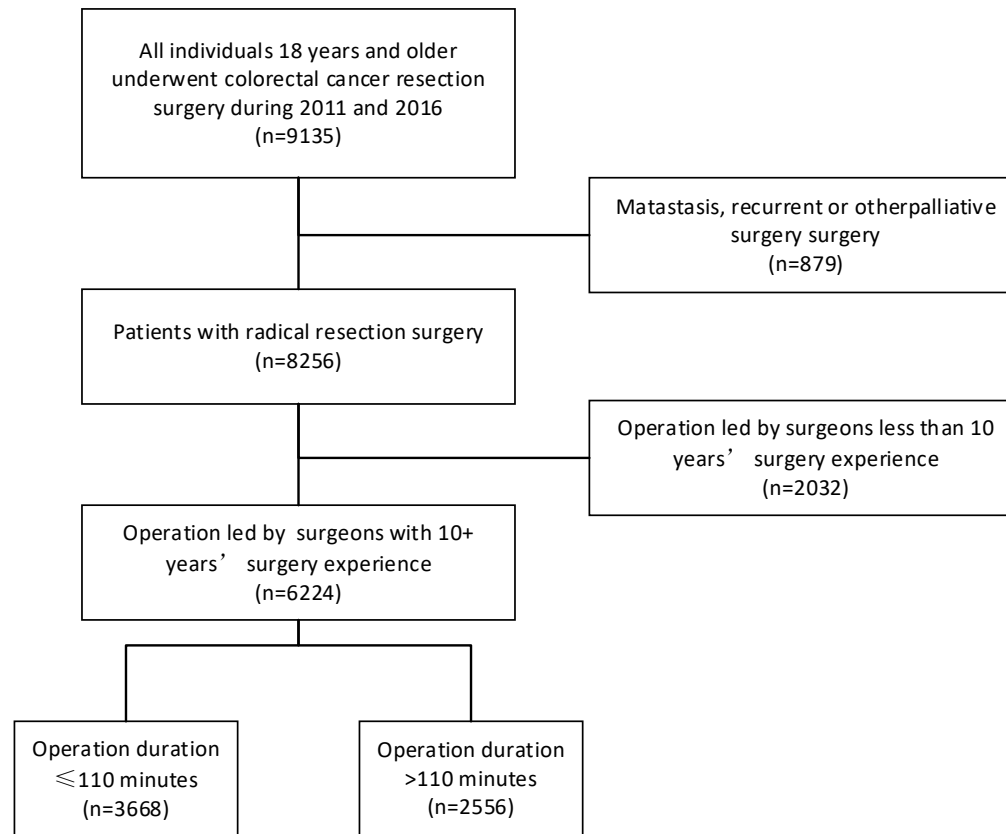

**Supplementary Figure 1** Diagram of patients' inclusion in the study

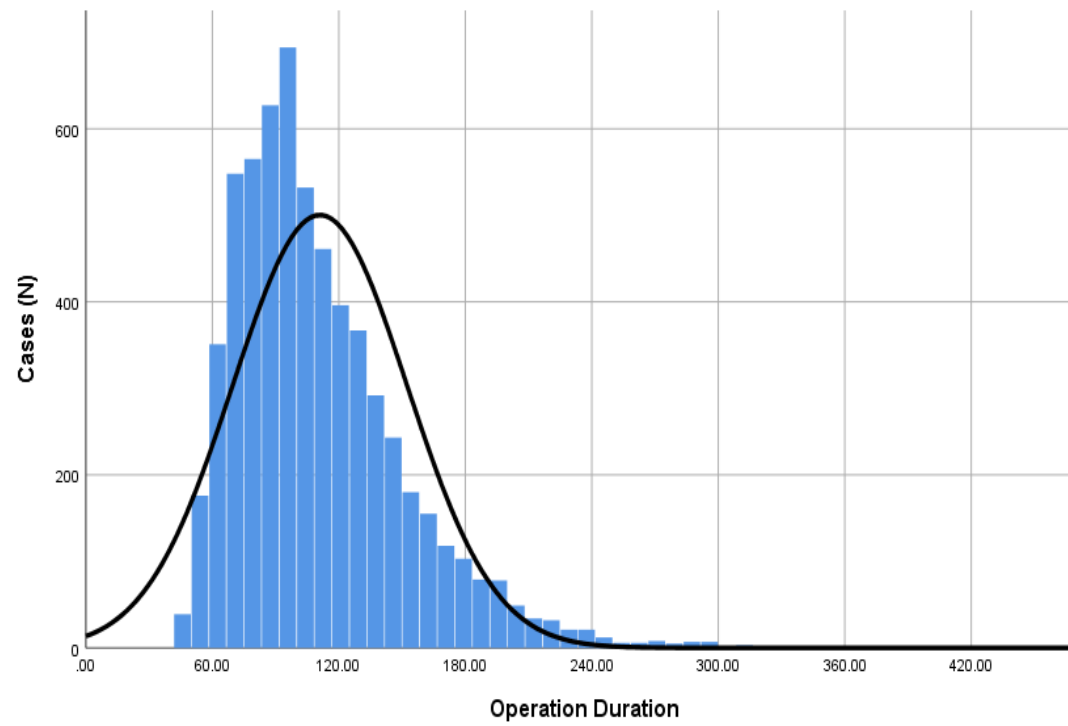

**Supplementary Figure 2** Distribution of CRC operation duration

### Distribution of Propensity Scores

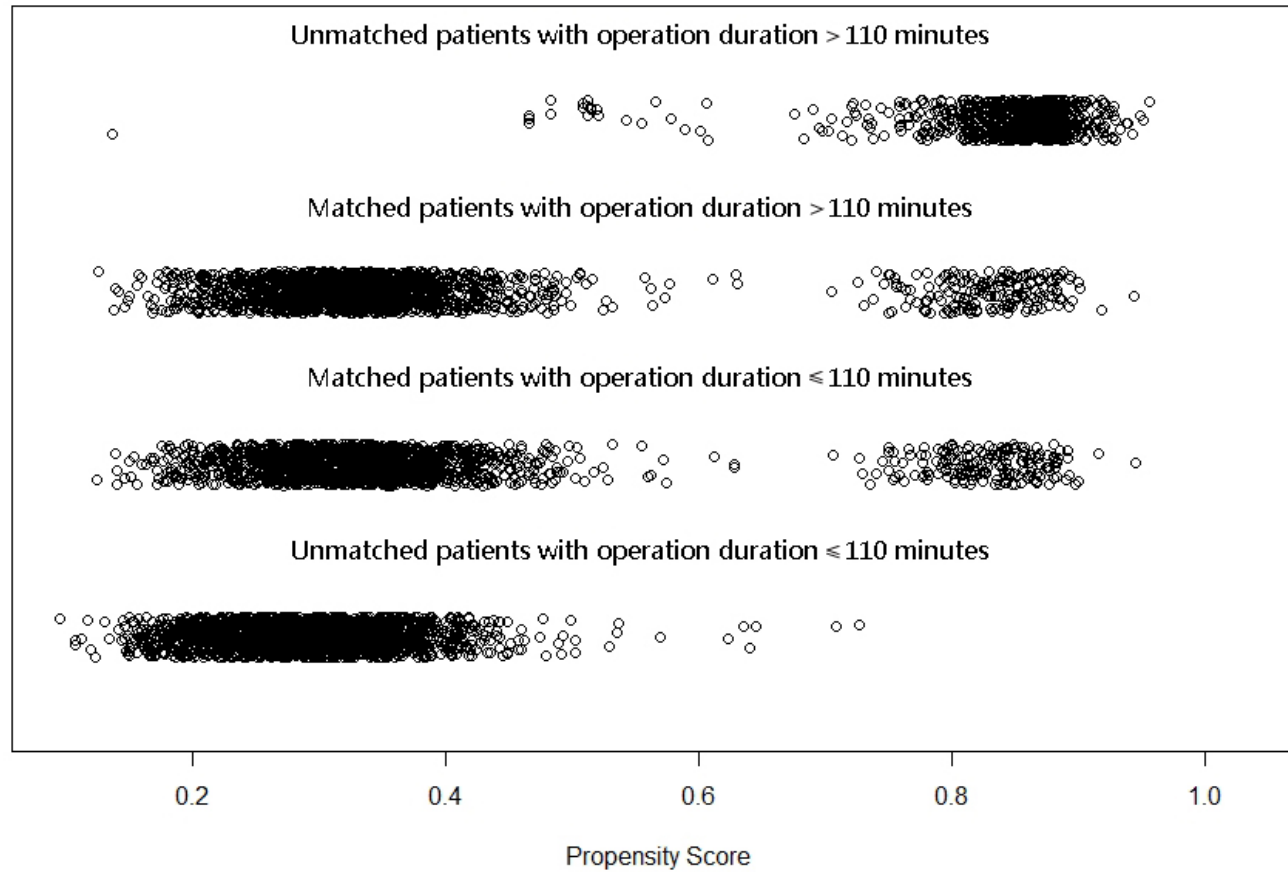

Supplementary Figure 3 Distribution of propensity matching: operation duration > 110minutes matching operation duration ≤110minutes.

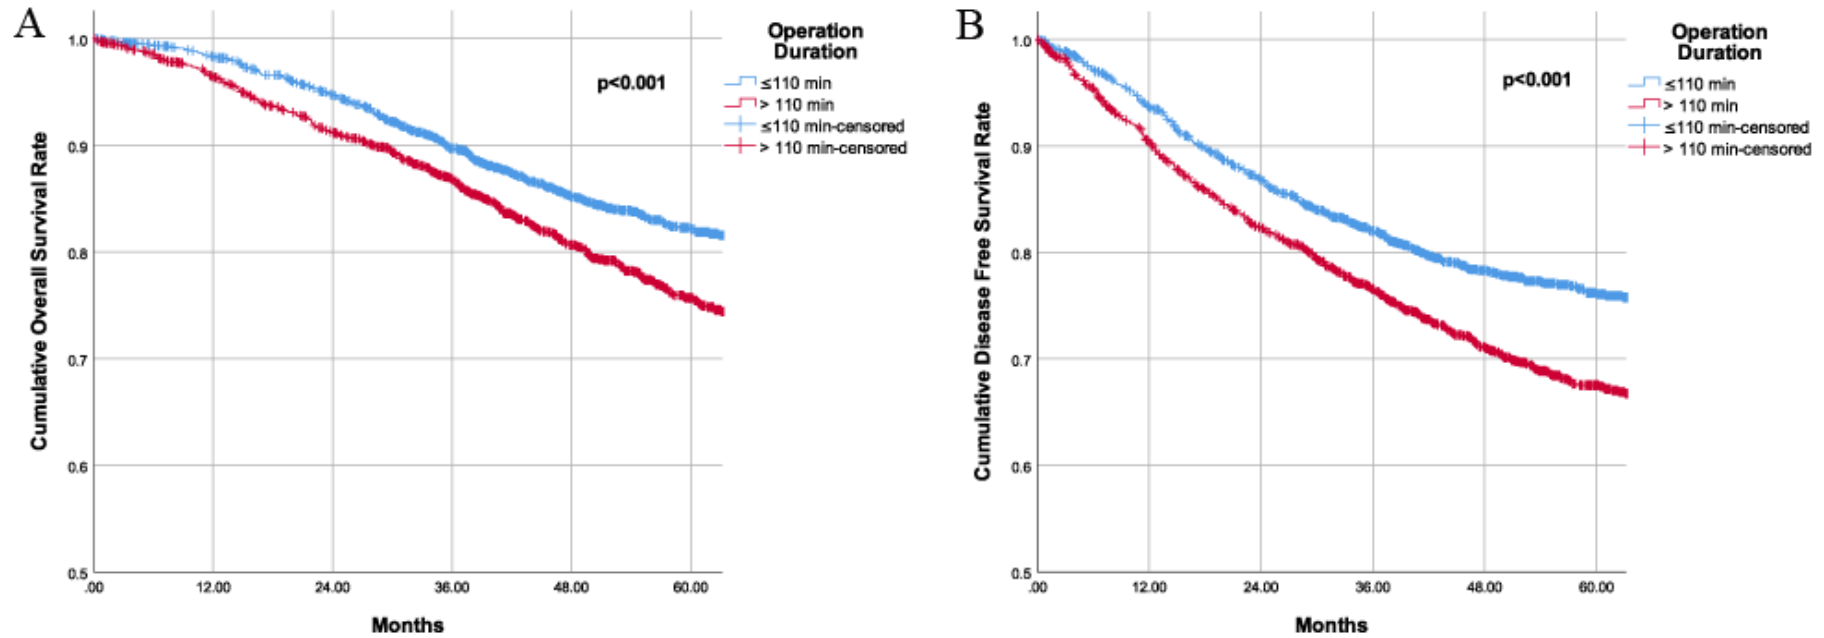

Supplementary Figure 4 A. Overall survival of patients with different operation duration after PSM  
B. Disease free survival of patients with different operation duration after PSM

**Supplementary Table 1** Baseline characteristics after PSM – 1:1 matching of patients with different operation duration

| Characteristics   |              | SOD ( $\leq 110$ min) |                  | LOD ( $> 110$ min) |                  | P value | SMD   |
|-------------------|--------------|-----------------------|------------------|--------------------|------------------|---------|-------|
|                   |              | N (%)                 | Mean ( $\pm$ SD) | N (%)              | Mean ( $\pm$ SD) |         |       |
| Gender            | Male         | 1070(49.33)           |                  | 1099(50.67)        |                  | 0.325   | 0.035 |
|                   | Female       | 660(51.12)            |                  | 631(48.88)         |                  |         |       |
| Age Group (year)  | < 45         | 211(49.88)            |                  | 212(50.12)         |                  | 0.768   | 0.046 |
|                   | 45-54        | 344(51.96)            |                  | 318(48.04)         |                  |         |       |
|                   | 55-64        | 616(49.96)            |                  | 617(50.04)         |                  |         |       |
|                   | 65-74        | 406(49.45)            |                  | 415(50.55)         |                  |         |       |
|                   | 75+          | 153(47.66)            |                  | 168(52.34)         |                  |         |       |
| Surgical Approach | Open Surgery | 1553(50.00)           |                  | 1553(50.00)        |                  |         |       |
|                   | Laparoscope  | 177(50.00)            |                  | 177(50.00)         |                  |         |       |
| pTNM Staging      | I            | 334(50.15)            |                  | 332(49.85)         |                  | 0.848   | 0.019 |

|                   |                            |             |             |       |        |
|-------------------|----------------------------|-------------|-------------|-------|--------|
|                   | II                         | 631(50.56)  | 617(49.44)  |       |        |
|                   | III                        | 765(49.48)  | 781(50.52)  |       |        |
| Tumor Site        | Rectum                     | 1005(49.95) | 1007(50.05) | 0.89  | 0.027  |
|                   | Left Colon                 | 307(48.96)  | 320(51.04)  |       |        |
|                   | Right Colon                | 402(51.02)  | 386(48.98)  |       |        |
| Histological type | Adenocarcinoma             | 1507(50.12) | 1500(49.88) | 0.867 | 0.018  |
|                   | Mucinous adenocarcinoma    | 189(48.84)  | 198(51.16)  |       |        |
|                   | Signet-ring cell carcinoma | 34(51.52)   | 32(48.48)   |       |        |
| EMVI              | -                          | 1382(50.07) | 1378(49.93) | 0.899 | 0.006  |
|                   | +                          | 348(49.71)  | 352(50.29)  |       |        |
| PNI               | -                          | 1392(50.00) | 1392(50.00) | 1     | <0.001 |
|                   | +                          | 338(50.00)  | 338(50.00)  |       |        |
| CRM               | -                          | 1716(50.09) | 1710(49.91) | 0.389 | 0.035  |
|                   | +                          | 14(41.18)   | 20(58.82)   |       |        |

|                                |               |               |       |       |
|--------------------------------|---------------|---------------|-------|-------|
| Number of lymph nodes examined | 125.91(21.50) | 125.73(20.95) | 0.738 | 0.011 |
| Hemoglobin (g/l )              | 41.86(3.84)   | 41.82(3.98)   | 0.8   | 0.009 |
| Albumin (g/l)                  | 41.86(3.84)   | 41.82(3.98)   | 0.786 | 0.009 |
| Total                          | 1730(100)     | 1730(100)     | -     | -     |

---
